# Supplementary material
Source: publisher site journal article supplement (https://www.dovepress.com/get_supplementary_file.php?f=152221b.xlsx)
Supplement: Supplementary file 2 [file get_supplementary_file.php]

## Sheet: Foglio1
name	age	gender	yo dis	FAB	MoCA	scid 1	scid2	MDS UPDRS-III bsl	MDS UPDRS-III FU	NMS bsl	NMS	PDQ 8	PDQ 8	Apathy bsl	Apathy FU	HAM A bsl	HAM A FU	HAM D bsl	HAM D FU	CGI bsl	CGI FU	BPRS bls	BPRS FU
Coccia Sergio	66	M	9	18	29	depressive disorders	0	37	35	8	6	3	3	15	15	28	21	28	22	3	3	42	38
Limentani Maria	49	F	9	18	30	anxiety disorders	0	21	18	12	9	3	3	7	3	30	24	20	15	4	3	37	30
Altobelli Pamela	39	F	3	18	28	depressive disorders	0	16		38		20		42		30		29		4		47
Di Santo Roberto	54	M	9	18	29	adjustment disorder	0	15	16	44	38	12	8	18	12	29	18	28	22	4	3	32	26
Quarenghi Paola	62	F	8	18	30	depressive disorders	0	16	14	44	42	8	8	12	12	26	18	28	24	3	2	36	26
Giuliani Stefano	62	M	8	18	28	anxiety disorders	0	18	18	4	4	5	5	8	8	32	26	16	12	3	2	30	25
Montaldi Gino	65	M	4	18	28	adjustment disorder	0	8	8	26	26	8	8	32	26	26	14	26	18	3	3	34	30
Graziano Gina	60	F	4	18	27	anxiety disorders	0	17	16	31	25	16	10	22	22	8	6	4	4	0	0	30	24
Braghese Enrico	62	M	4	17	27	adjustment disorder	0	13	13	7	7	3	3	18	12	20	14	28	24	3	2	34	28
Sinibaldi Ennio	65	M	9	18	30	anxiety disorders	0	18	16	21	15	9	9	16	15	32	20	18	12	3	3	34	26
									Emotion recognition
									blocco 1
									blocco 2
									CASE 4
									blocco 3
									CASE 4
									blocco 4
									CASE 4
									blocco 5
									CASE 3
									blocco 6
									CASE 4
									blocco 7
									CASE 4
									blocco 8
									CASE 4
									blocco 9
									CASE 4
									blocco 10
									CASE 4
									blocco 11
									CASE 4
